# Supplementary material
Source: PubMed Central journal article supplement (PMC3462079)
Supplement: supp_jcs.094292_JCS094292.pdf [file supp_jcs.094292_JCS094292.pdf]

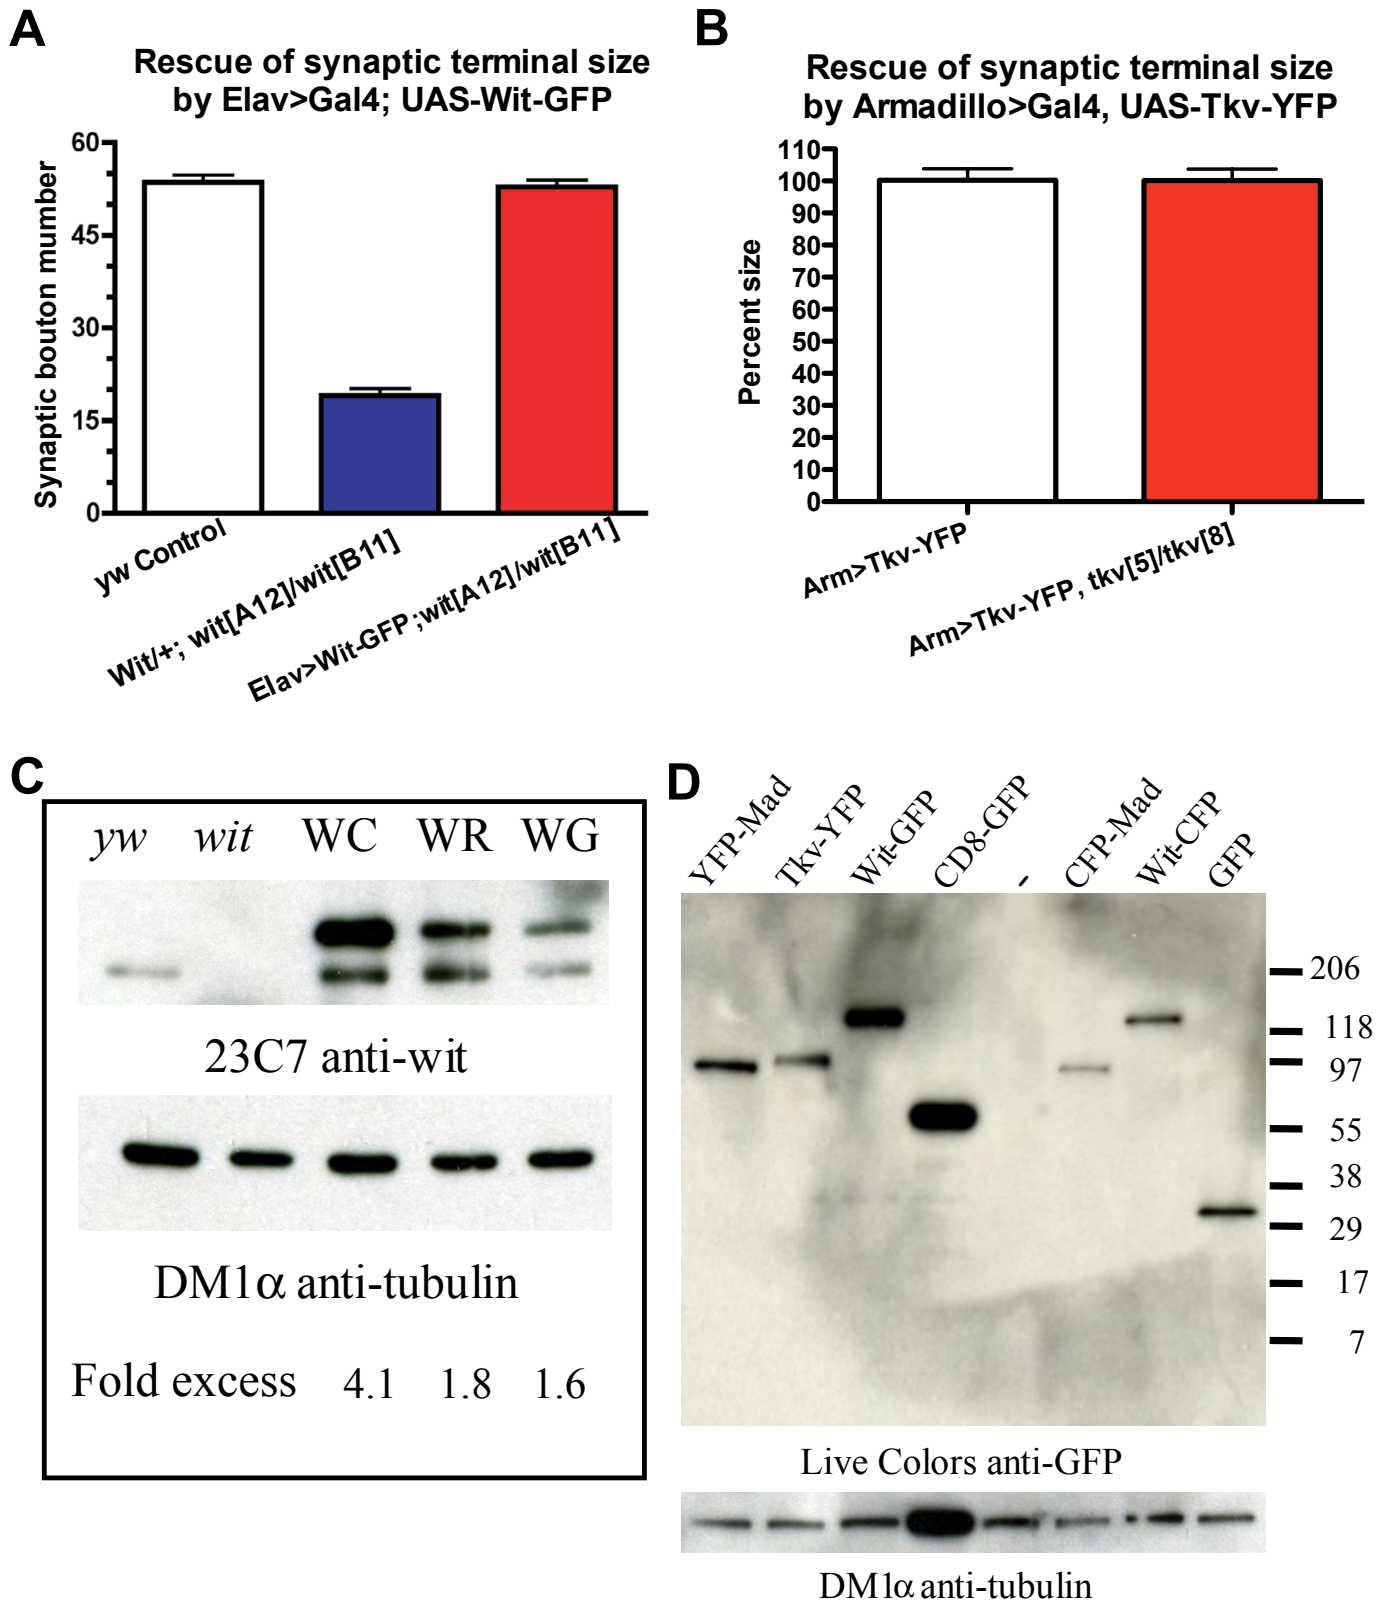

**Fig. S1. Fluorescent fusion proteins are functional and show normal levels and molecular weight.** (A) *Elav>Gal4* expressing *Wit-GFP* rescued bouton number in *wit* mutants (*UAS>wit*<sup>+/+</sup>; *wit*<sup>A12</sup>/*wit*<sup>B11</sup>, the *UAS* transgene is silent in this genotype due to the absence of *Gal4* driver) to levels not significantly different from control ( $P < 0.0001$ ). (B) *Arm>Gal4* expressing *Tkv-YFP* rescued embryonic lethality to pupal stages and fully rescued the synaptic terminal size in muscle 4 in *tkv* mutants (*tkv*<sup>5</sup>/*tkv*<sup>8</sup>). (C) Western blot analysis of larval CNS shows low to moderate levels of OK6 overexpression of *Wit* fluorescent fusion proteins (top band in upper panel, absent in non transgenic controls *yw*) when compared to endogenous *Wit* (bottom band in upper panel, absent in *wit* mutants). Fold excess expression of the transgenes to the endogenous gene was as follows: *Wit-CFP* (WC) 4.1; *Wit-mCherry* (WR) 1.8; *Wit-GFP* (WG) 1.6. (D) Larval CNS were analyzed to verify that no unconjugated XFP was present in animals expressing the fluorescent fusion proteins. Note free GFP band in lane 8 and absence of GFP-containing cleavage products.

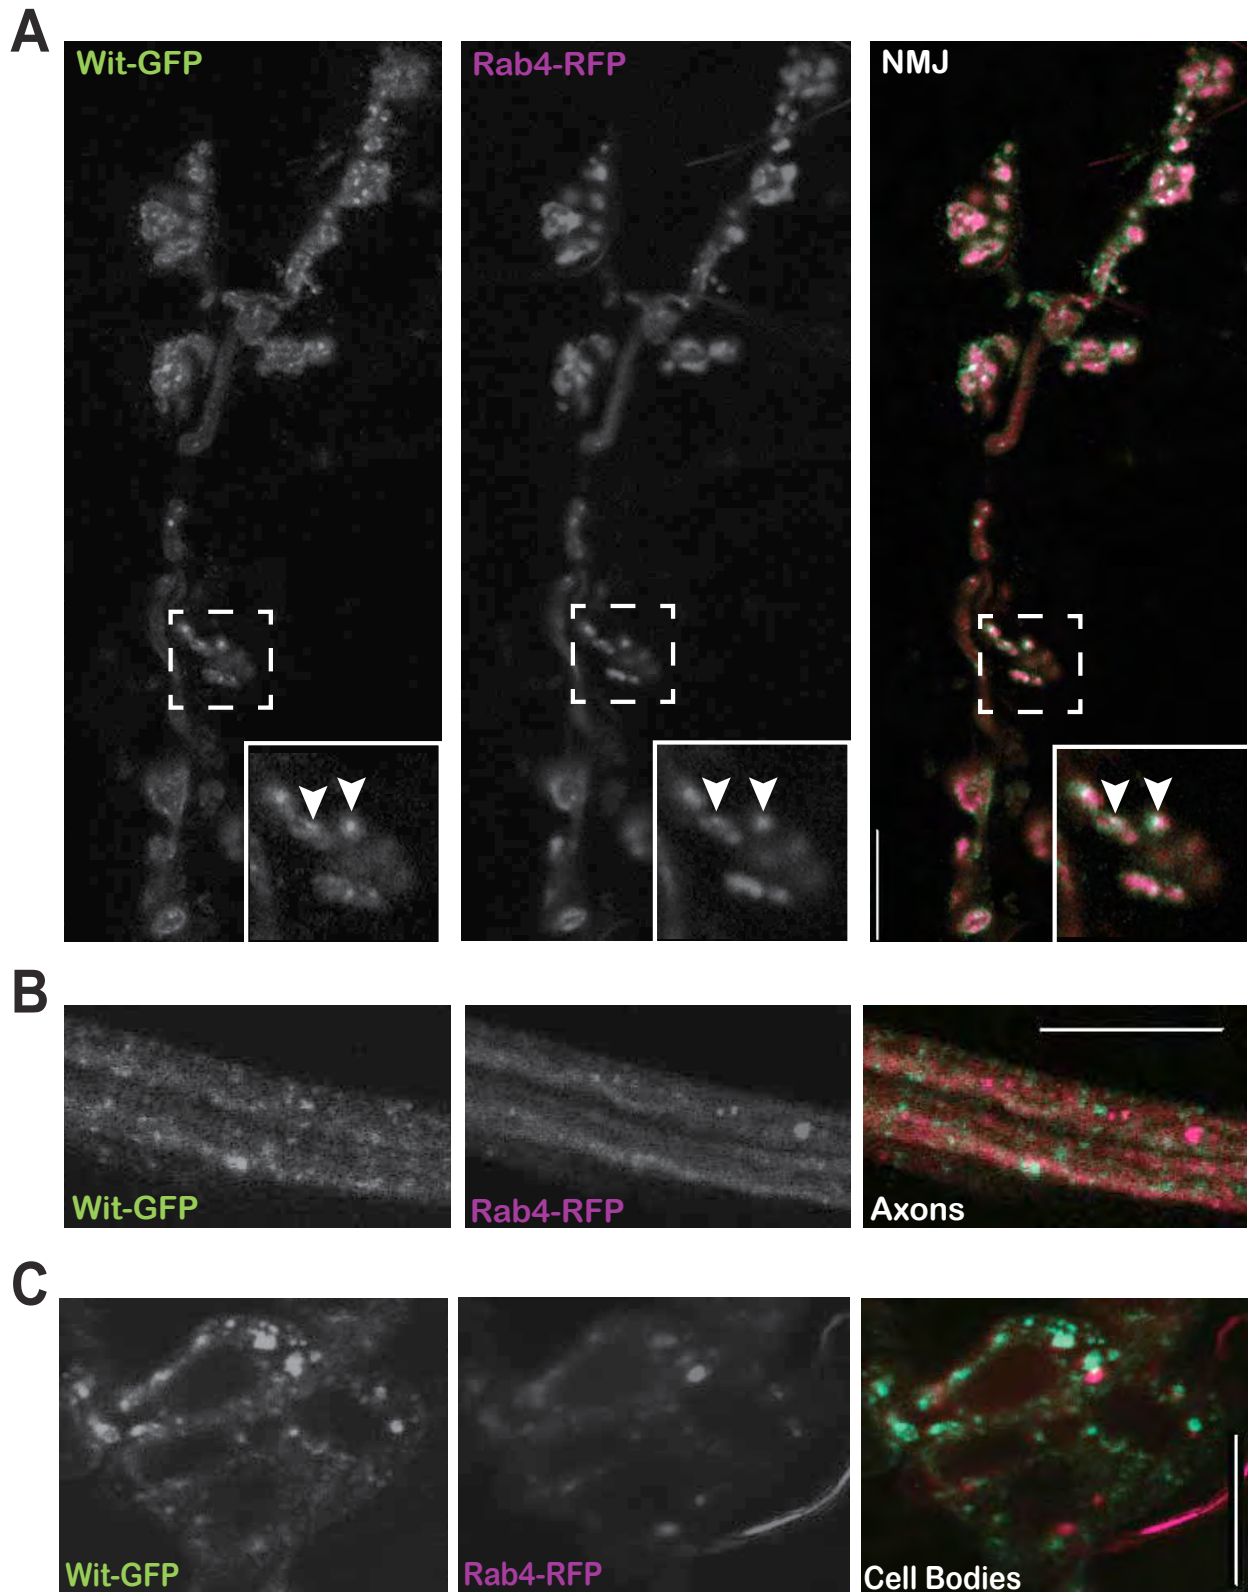

**Fig. S2. Wit-GFP and Rab4-RFP colocalize at the NMJ but not in cell bodies or axons.** (A) Wit-GFP (green) and Rab4-RFP (magenta) partially colocalize at the NMJ. Wit-GFP and Rab4-RFP do not colocalize along the axon (B) or in motoneuron cell bodies (C). Note Wit-GFP plasma membrane localization in A. Scale bars: 10  $\mu$ m.

1. Original Image    2. ROI and threshold analysis    3. Quantification

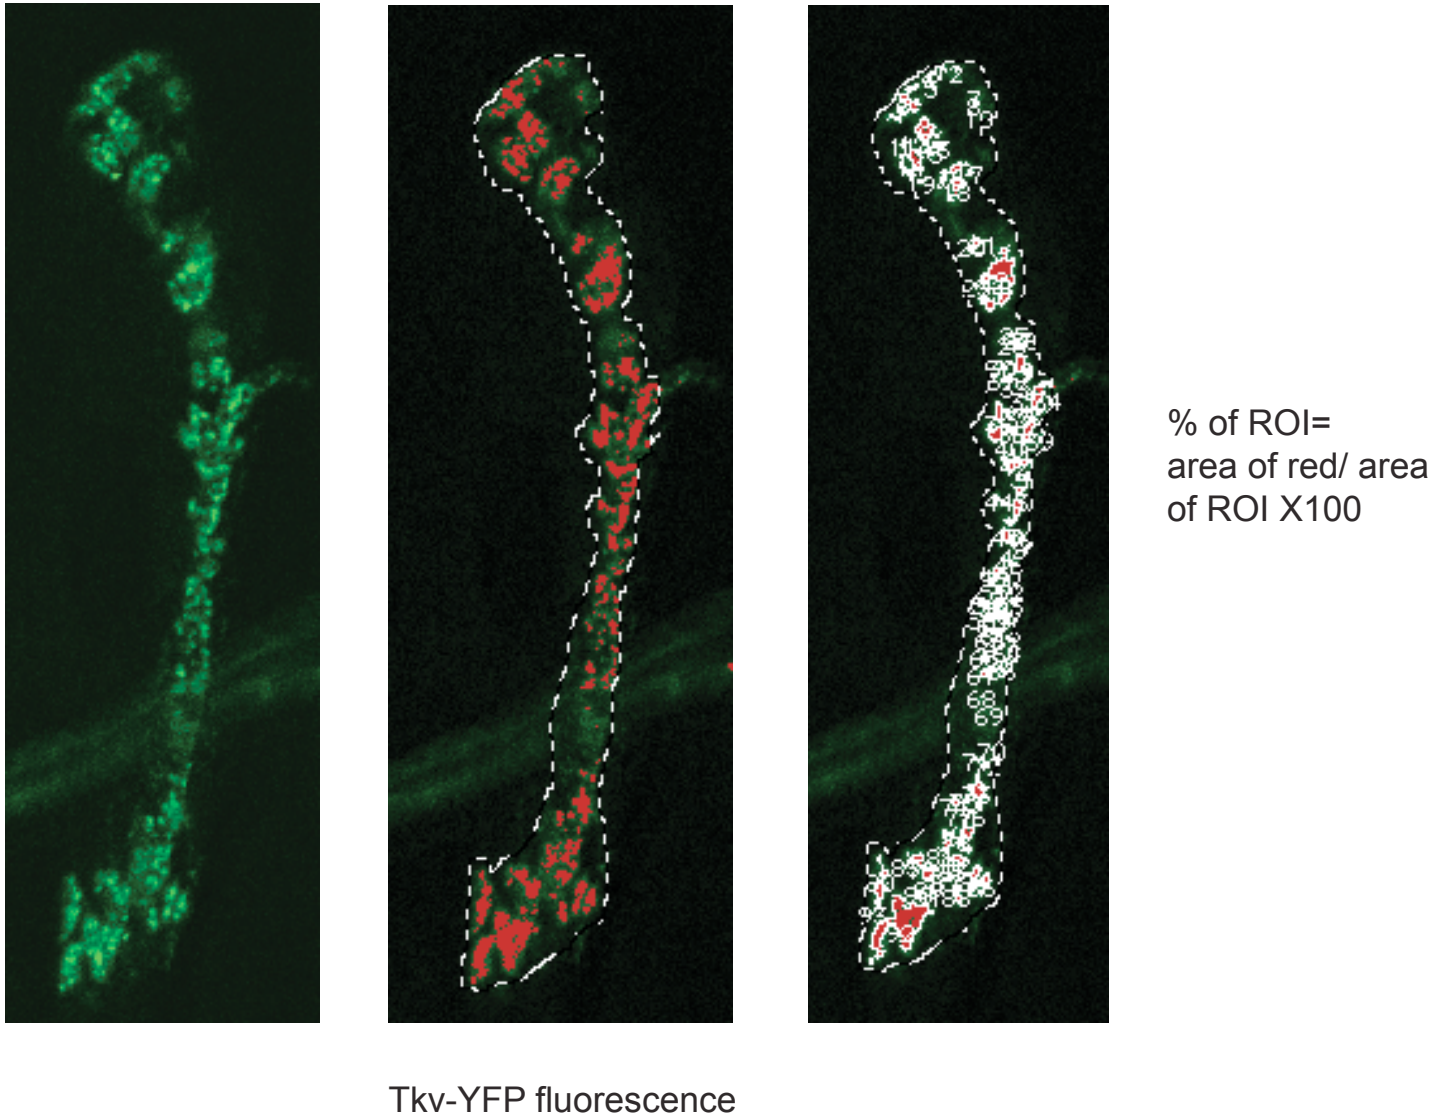

**Fig. S3. Quantifying synaptic fluorescence.** To quantify Tkv-YFP fluorescence at the synaptic terminal (1) the following steps were taken. An ROI was drawn around the synaptic terminal in the HRP channel (2) and then transferred to the Tkv-YFP channel. (3) Threshold analysis was conducted to identify the Tkv-YFP punctae, and the area of regions within the ROI that had signal intensity above a given threshold was added. The combined area of the regions divided by the ROI total area is the normalized amount (in arbitrary units) of Tkv-YFP in the synaptic terminal. pMad fluorescence was quantified in a similar manner.

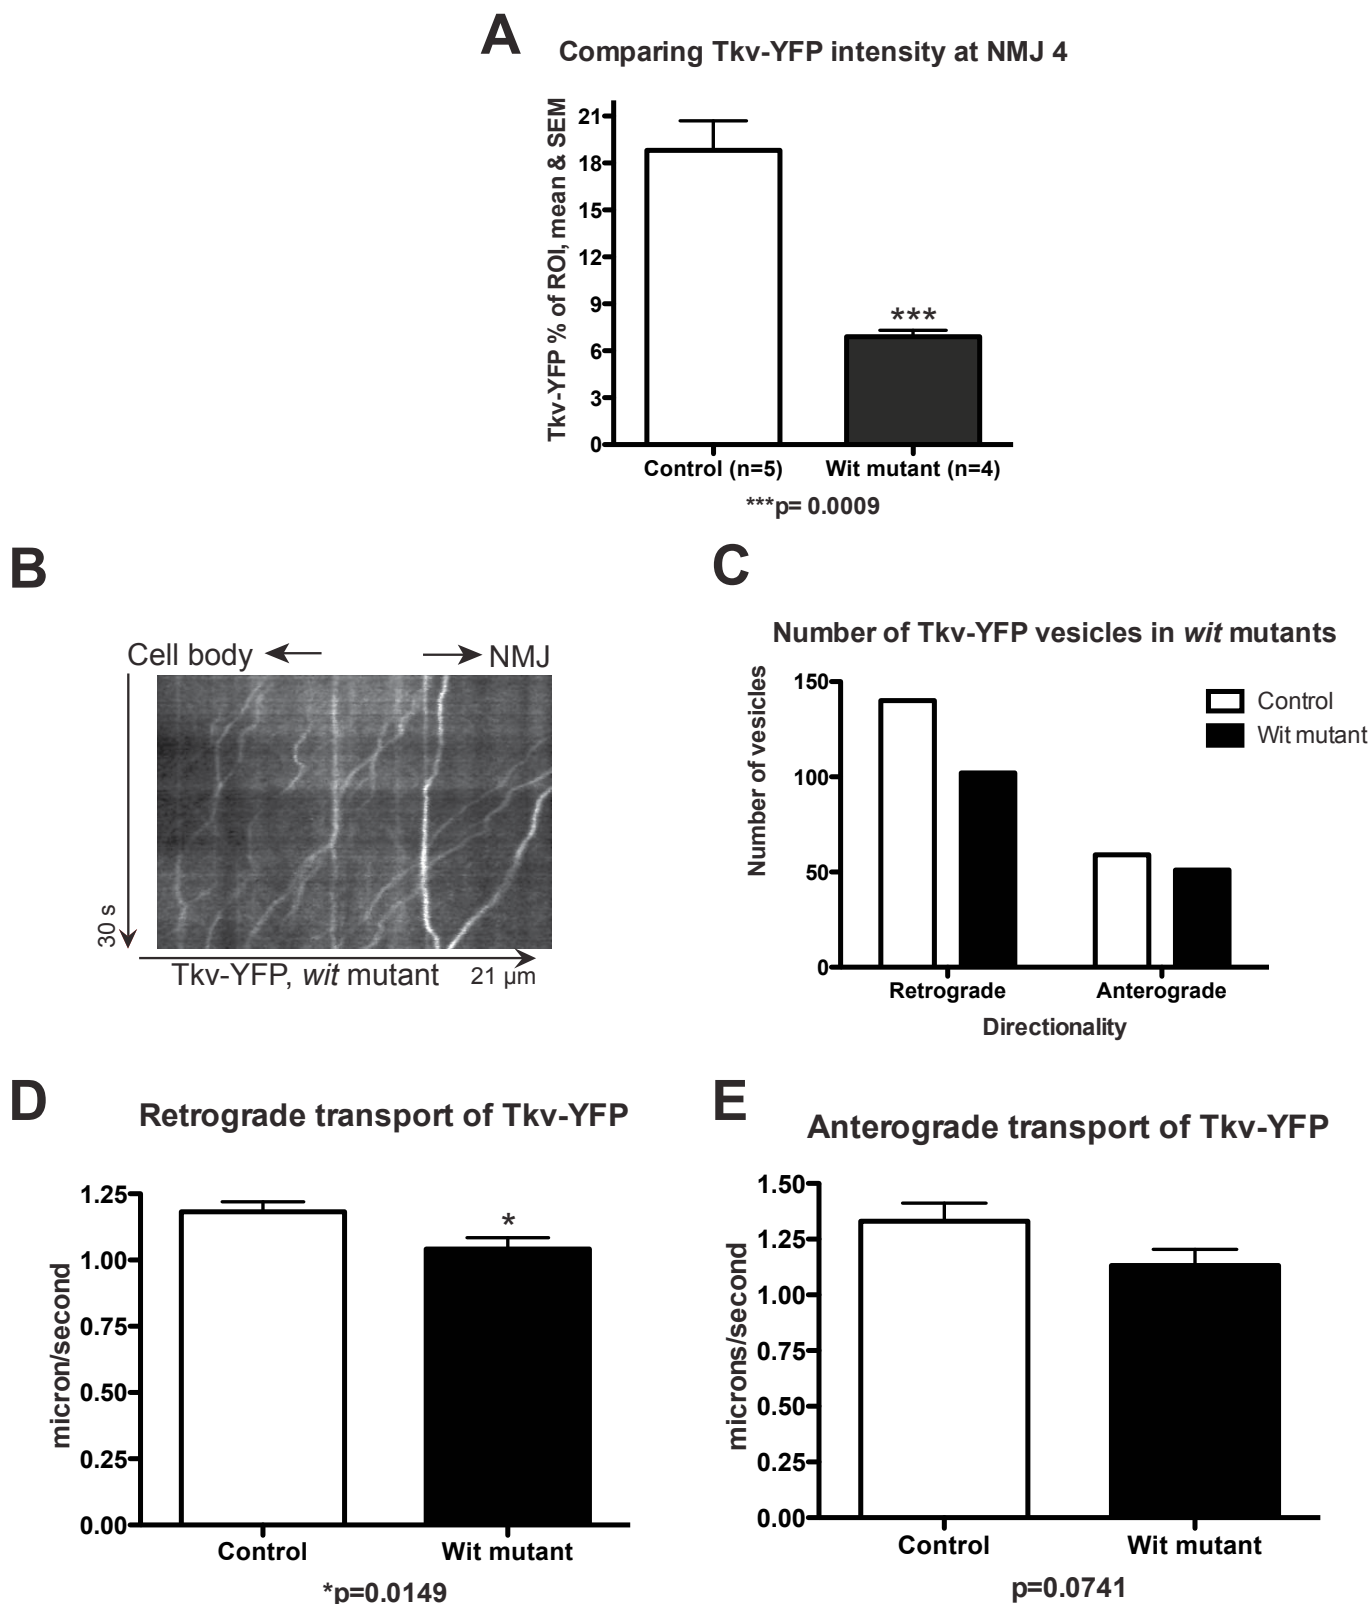

**Fig. S4. Distribution and movement of Tkv-YFP in *wit* mutants.** (A) Synaptic terminal muscle four images were quantified for fluorescence and measured for comparisons between control and *wit* mutants. Compared to control ( $n=5$ ), *wit* mutants ( $n=4$ ) had a 63% decrease in Tkv-YFP intensity at the synaptic terminal. Compared to control ( $n=5$ ), *wit* mutants ( $n=4$ ) had a 63% decrease in Tkv-YFP intensity at the synaptic terminal. (B) Kymograph analysis of Tkv-YFP retrograde vesicular traffic (ascending slope projections) in a *wit* mutant. (C) Analysis of movement directionality of Tkv-YFP shows a decrease (although not reaching significance) in the number of retrograde vesicles in the *wit* mutant compared to Tkv-YFP vesicles in control. Anterograde traffic is barely affected by loss of *wit*. The velocity of Tkv-YFP vesicles along the axon was measured in control and *wit* mutants. (D) The retrograde speed of Tkv vesicles was slightly reduced in *wit* mutants ( $P=0.0149$ ). (E) The anterograde speed was also slightly reduced in the mutant, but it was not significantly different from control ( $P=0.0741$ ).



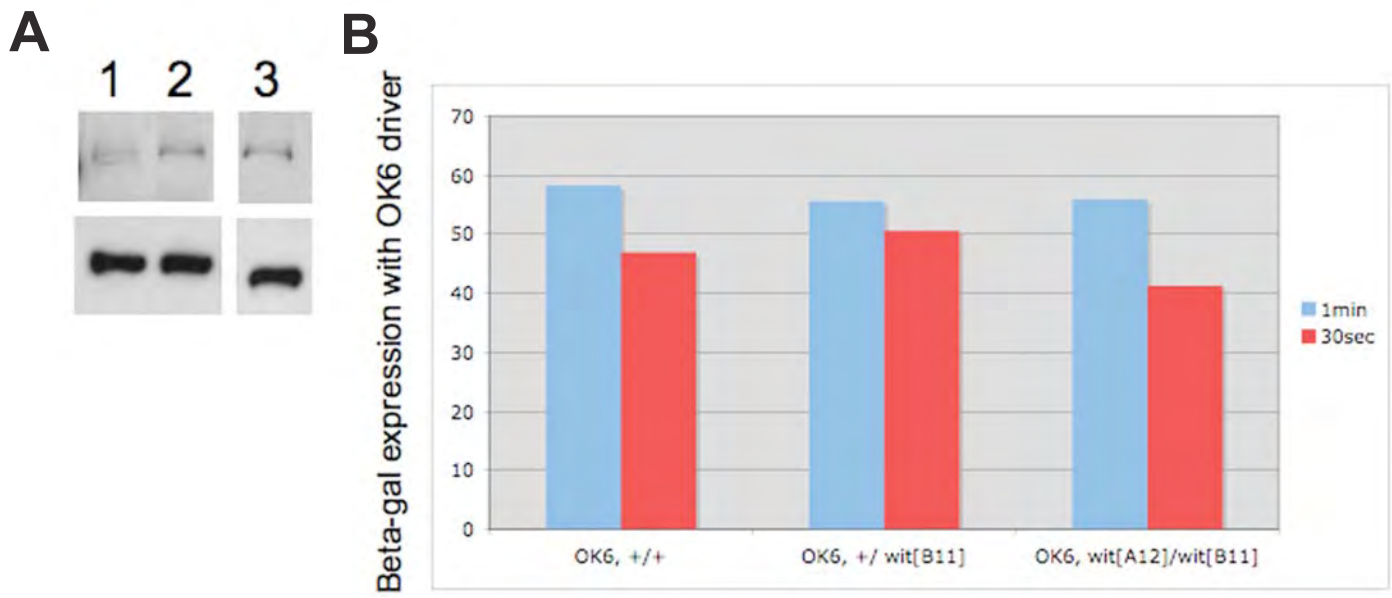

**Fig. S5. OK6 driver expression is not affected by BMP signaling.** (A) Western blot of  $\beta$ -Gal expressed by driver OK6. Third-instar larval brains with the following genotypes were analyzed by western blot: 1. Control: OK6>Gal4/UAS> $\beta$ -Gal; +/+. 2. *wit* heterozygote: OK6>Gal4/UAS> $\beta$ -Gal; +/- *wit*<sup>B11</sup>. 3. *wit* mutant: OK6>Gal4/UAS> $\beta$ -Gal; *wit*<sup>A12</sup>/*wit*<sup>B11</sup>. Each lane contains the equivalent of 2 larval brains and Tubulin (lower panel) was used as loading control. (B) Quantification of the western  $\beta$ -Gal bands normalized to tubulin signal with exposure times of 1 min (blue) or 30 sec (red).

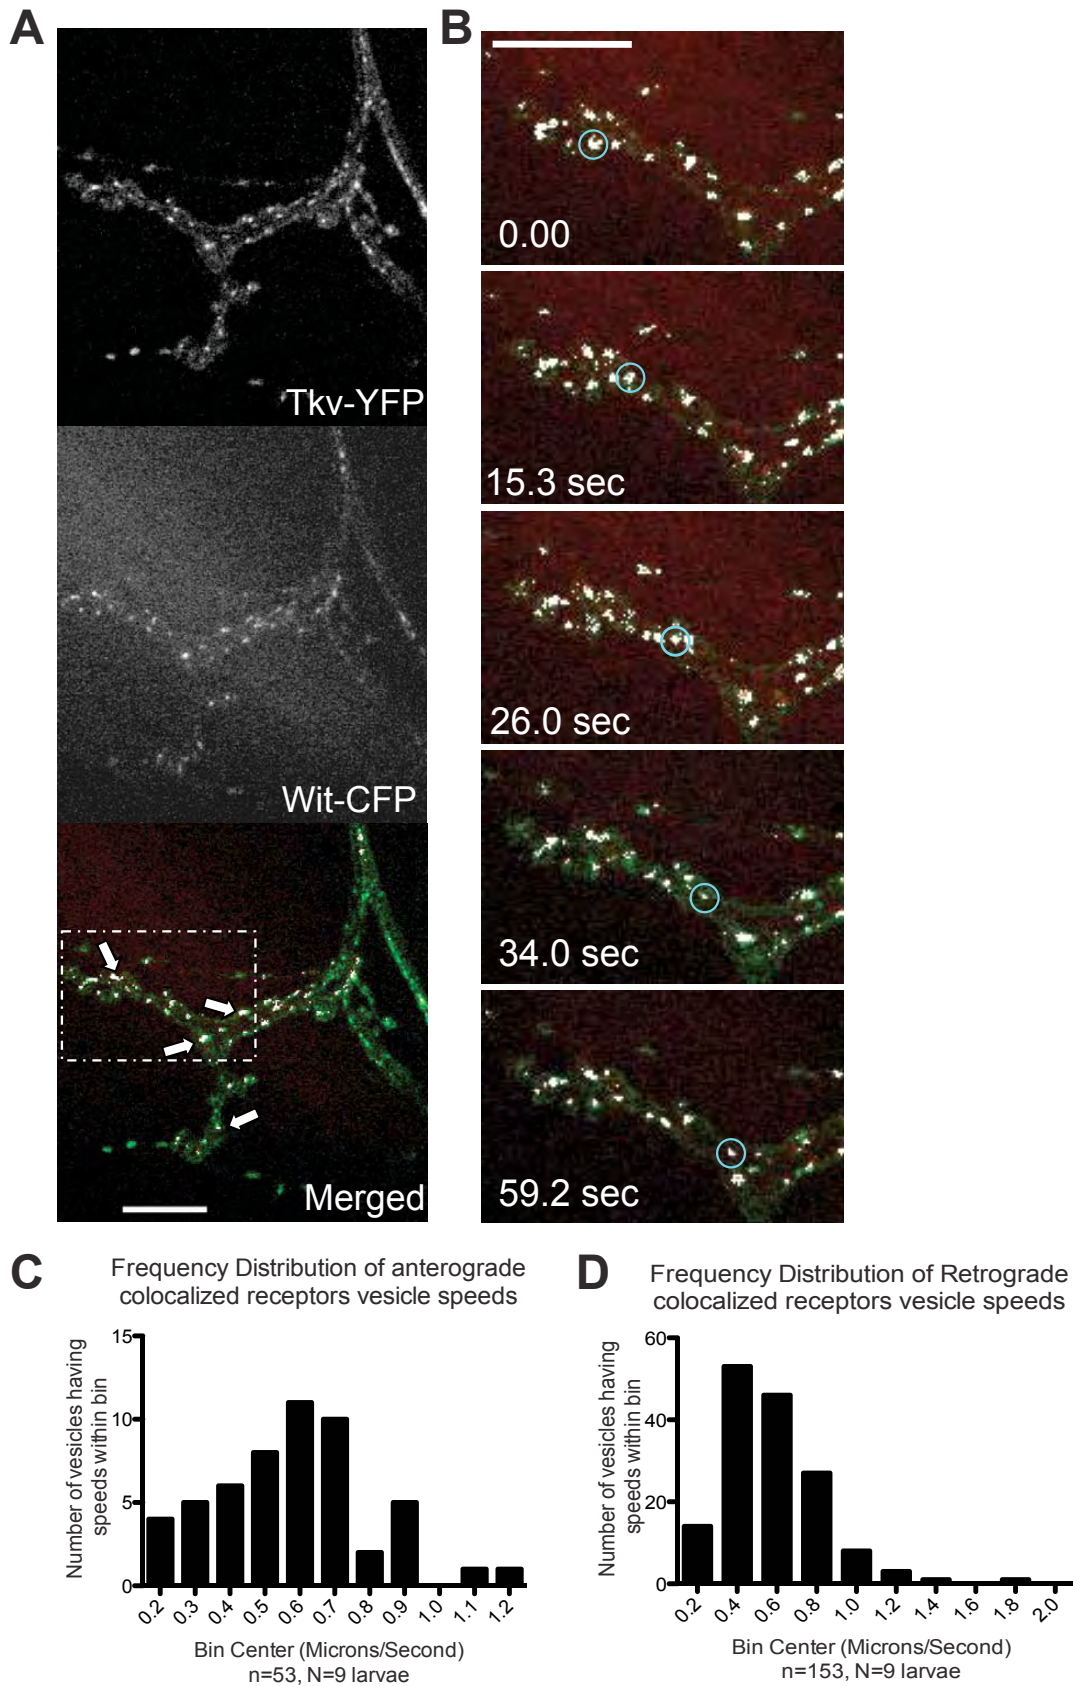

**Fig. S6. Wit and Tkv colocalize at the synaptic terminal in dynamic vesicles that move bidirectionally along the axon.** (A) Expression of Tkv-YFP and Wit-CFP in motoneurons shows receptor colocalization (white in bottom panel, arrows) at the synaptic terminal. (B) Enlarged frames of a time-lapse movie (box in merged panel in A) show that vesicles move at the synaptic terminal. The highlighted vesicle (blue circle) is moving in a retrograde direction, away from the distal end of the synaptic terminal. Tkv-YFP and Wit-CFP were expressed with motoneuron drivers BG380 and OK6. Scale bar: 10  $\mu$ m. (C) Speed distribution of colocalized Wit-CFP/Tkv-YFP axonal anterograde traffic, range 0.20–1.18  $\mu$ m/s. (D) Speed distribution of colocalized Wit-CFP/Tkv-YFP axonal retrograde traffic, range 0.23–1.82  $\mu$ m/s.
